# Supplementary material
Source: publisher site journal article supplement (https://neotropical.pensoft.net/article/86548/download/suppl/31/)
Supplement: Supplementary file 1

## Sheet: Sheet1
			Table S1. Molecular, biochemical, and physiological profiles of SDF strains belonging to the AEFBC
Taxonomic assignment (%similarity)	SDF Strain	NCBI access number	Growth condition									Enzyme				Hydrolysis				Amino acid decomposition					Indole production	Production of acid from						Voges-Proskauer test
			Citrate utilization	Propionate utilization	7% Nacl	10% Nacl	Lysozyme	45 °C	65 °C	pH 5.7	Anaerobiosis	Catalase	Oxidase	Hemolysin	Nitrate reductase	Casein	Gelatin	Esculin	Starch	Phenylalanine degradation	Tyrosine degradation	Arginine dihydrolase	Lysine decarboxylase	Ornithine decarboxylase		D-Glucose	L-Arabinose	Lactose	Mannitol	Sucrose	D-Xylose
Bacillus pumilus (99%)	0001	MH356287	-	+	+	+	-	+	-	+	-	+	+	+	-	+	+	-	-	-	-	-	-	-	-	+	+	-	+	+	-	+
Bacillus safensis (99%)	0002	MH356288	-	-	+	+	-	+	-	+	-	+	-	+	-	+	+	-	-	-	-	-	-	-	-	+	+	-	+	+	-	+
Bacillus subtilis (97%)	0003	MH356289	+	-	+	+	-	+	-	-	-	+	-	+	+	+	+	-	-	-	-	-	-	+	-	+	-	-	+	+	-	+
Bacillus pumilus (99%)	0004	MH356290	+	-	+	-	+	+	-	+	-	+	-	+	+	+	+	-	-	-	-	-	-	-	-	+	+	-	+	+	-	+
Lysinibacillus fusiformis (98%)	0005	MH356291	+	-	+	+	-	+	-	-	-	+	+	-	-	+	+	-	-	-	-	-	-	-	-	-	-	-	-	-	-	-
Bacillus cereus (98%)	0006	MH356292	-	+	-	-	+	+	-	+	+	+	-	+	+	+	+	-	+	+	+	+	-	-	-	+	-	-	-	+	-	+
Bacillus circulans (98%)	0007	MH356293	-	+	+	-	-	+	-	+	-	+	-	-	+	+	+	-	+	-	+	-	-	-	-	+	+	-	+	+	-	+
Paenibacillus alvei (99%)	0008	MH356294	-	-	-	-	-	+	-	-	+	+	+	-	+	-	-	-	-	-	-	-	-	-	+	+	-	-	+	+	-	+
Bacillus simplex (99%)	0009	MH356295	-	-	+	-	-	+	-	-	-	+	+	-	+	+	+	-	-	-	-	+	+	+	-	+	-	-	+	-	-	+
Bacillus clausii (99%)	0010	MH356296	-	-	-	-	-	+	-	+	-	-	-	-	-	-	+	+	-	-	-	+	+	+	-	-	+	-	-	-	-	-
Bacillus pumilus (100%)	0011	MH356297	-	-	+	+	+	+	-	+	-	+	+	+	-	+	+	-	-	-	-	-	o	-	-	+	+	-	+	+	-	+
Bacillus clausii (99%)	0012	MH569343	-	-	+	-	-	+	-	+	+	+	-	-	+	+	+	-	+	-	+	-	-	-	-	+	-	-	-	-	-	+
Bacillus safensis (99%)	0013	MH356298	-	-	+	-	+	+	-	+	-	+	-	+	-	+	+	-	-	-	-	-	-	-	-	+	+	-	+	+	-	+
Brevibacillus borstelensis (96%)	0014	MH356299	-	-	-	-	-	+	-	+	-	+	-	-	+	-	+	-	-	-	-	+	+	+	-	-	-	-	-	-	-	-
Bacillus oleronius (99%)	0015	MH356300	-	-	+	+	-	+	-	+	-	-	-	-	+	+	-	-	-	-	+	-	-	-	-	-	-	-	-	-	-	-
Bacillus simplex (98%)	0016	MH356301	-	-	+	-	-	+	-	+	-	+	-	-	-	+	+	-	-	-	-	+	+	+	-	-	-	-	-	-	-	-
Bacillus altitudinis (99%)	0017	MH356302	-	+	+	-	+	+	-	+	-	+	-	+	-	+	+	-	+	-	-	-	-	-	-	+	+	-	+	+	-	+
Bacillus clausii (100%)	0018	MH356303	-	-	+	-	-	+	-	+	-	+	-	-	-	+	+	-	-	-	-	+	+	+	-	-	+	-	-	-	-	-
Lysinibacillus sphaericus (97%)	0019	MH356304	-	+	-	-	+	+	-	+	-	+	-	+	-	-	+	-	-	-	-	+	+	+	-	-	-	-	-	-	-	-
Brevibacillus laterosporus (100%)	0020	MH356305	-	-	-	-	-	+	-	-	-	-	-	+	+	-	-	-	-	-	-	-	-	-	-	+	-	-	+	-	-	+
Bacillus pumilus (ND)	0021	MH569344	-	+	-	-	-	+	-	+	-	+	-	-	+	+	+	-	-	-	-	-	-	-	-	+	+	-	+	+	-	+
Bacillus cereus (100%)	0022	MH356306	-	+	-	-	+	+	-	-	+	+	-	+	+	+	+	-	+	-	-	-	-	-	-	+	-	-	+	-	-	+
Paenibacillus alvei (99%)	0023	MH569345	-	-	-	-	+	+	-	-	+	+	+	-	-	-	+	-	-	-	-	-	-	-	+	+	-	-	-	-	-	+
Bacillus simplex	0024	MH569346	-	-	-	-	-	+	-	+	-	+	-	+	+	-	+	-	-	-	-	+	+	+	-	+	-	-	-	-	-	-
Bacillus subtilis (97%)	0025	MH569347	-	+	-	-	-	+	-	+	-	+	-	+	+	-	+	-	+	-	-	+	-	-	-	+	-	-	-	-	-	-
Bacillus pumilus (97%)	0026	MH356307	+	+	+	-	+	+	-	+	-	+	-	+	-	+	+	-	-	-	-	-	-	-	-	+	+	-	+	+	-	+
Bacillus safensis (100%)	0027	MH356308	+	-	+	+	-	+	-	+	-	+	-	+	-	+	+	+	-	-	-	-	-	-	-	+	-	-	+	+	-	+
Paenibacillus alvei (100%)	0028	MH356309	-	-	+	-	+	+	-	+	+	+	+	-	-	-	+	-	-	-	-	-	-	-	+	+	-	-	-	+	-	+
Bacillus aryabhattai (99%)	0029	MH356310	-	-	+	+	-	+	-	+	-	+	-	-	+	-	+	-	-	-	-	+	-	-	-	+	+	-	+	+	-	+
Bacillus thuringiensis (99%)	0030	MH356311	-	+	-	-	+	+	-	+	+	+	+	-	+	-	+	-	+	-	-	-	-	-	-	+	-	-	-	-	-	+
ND	0031		-	-	-	-	-	+	-	+	-	+	-	-	-	+	+	-	-	-	-	-	-	-	-	+	+	-	+	+	-	-
Bacillus cereus (98%)	0032	MH356312	-	+	+	+	+	+	-	+	-	+	-	+	+	+	+	-	+	-	-	-	-	-	-	+	-	-	-	+	-	+
ND	0033		-	-	+	-	-	+	-	+	+	+	-	-	+	+	-	+	+	-	-	-	-	-	-	+	+	+	+	+	-	+
Bacillus pumilus (100%)	0034	MH356313	+	-	+	-	+	+	-	+	-	+	-	+	+	+	+	+	-	-	-	-	-	-	-	+	+	-	-	+	-	+
Bacillus pumilus (100%)	0035	MH356314	-	-	+	+	+	+	-	+	-	+	-	+	+	+	+	-	-	-	-	-	-	-	-	+	+	-	+	+	-	+
Bacillus altitudinis (99%)	0036	MH356315	+	-	+	+	+	+	-	+	-	+	-	+	+	-	+	-	-	-	-	-	-	-	-	+	+	-	+	+	-	+
Lysinibacillus sphaericus (99%)	0037	MH356316	-	+	-	-	-	+	-	+	-	+	-	-	+	-	+	-	-	-	-	+	+	+	-	+	-	-	-	-	-	-
ND	0038		+	-	+	-	-	+	-	+	-	+	-	-	+	+	+	-	-	-	-	-	-	-	-	+	+	-	+	+	-	-
ND	0039		-	-	+	-	-	+	-	+	-	+	-	+	+	+	+	-	-	-	-	-	-	-	-	+	+	-	-	+	-	-
ND	0040		-	-	-	-	-	+	-	+	-	+	-	-	+	+	+	-	-	-	-	-	-	-	-	+	+	-	-	+	-	-
ND	0041		-	-	+	-	-	+	-	+	-	+	-	-	-	+	-	-	-	-	+	-	-	-	-	+	+	-	+	+	-	-
ND	0042		-	+	+	-	-	+	-	+	-	+	+	-	-	-	+	-	-	-	-	+	+	+	-	+	-	-	-	-	-	-
Bacillus safensis (98%)	0043	MH356317	-	-	+	+	-	+	-	+	-	+	-	-	-	+	+	+	-	-	-	-	-	-	-	+	-	-	-	+	-	+
Bacillus pumilus (99%)	0044	MH356318	+	-	+	+	+	+	-	+	-	+	-	+	-	+	+	-	-	-	-	-	-	-	-	+	+	-	+	+	-	+
ND	0045		+	-	-	-	-	+	-	+	-	+	-	-	-	+	+	-	+	-	+	-	-	-	-	+	+	+	+	+	+	-
Bacillus pumilus (99%)	0046	MH356319	+	-	+	-	-	+	-	+	-	+	-	+	-	+	+	-	-	-	-	-	-	-	-	+	+	-	+	+	-	+
Bacillus megaterium (98%)	0047	MH356320	-	-	+	-	-	+	-	+	-	+	-	+	-	+	+	-	+	-	-	+	+	+	-	+	-	+	+	+	-	-
ND	0048		-	-	+	-	-	+	-	+	-	+	-	-	-	-	+	-	-	-	-	-	-	-	-	-	-	-	-	-	-	-
Bacillus aryabhattai (99%)	0049	MH356321	-	-	-	-	-	+	-	+	-	+	-	-	-	+	-	-	+	-	+	-	-	-	-	+	-	+	+	+	-	-
Bacillus megaterium (98%)	0050	MH356322	-	+	+	-	-	+	-	+	-	+	-	-	-	+	+	-	-	-	-	-	-	-	-	+	-	-	-	-	-	-
Bacillus megaterium (99%)	0051	MH356323	+	-	-	-	-	+	-	+	-	+	-	-	-	+	+	-	-	-	-	-	-	-	-	+	+	+	+	+	-	-
Bacillus pumilus (100%)	0052	MH356324	+	+	+	-	-	+	-	+	-	+	-	+	-	+	+	+	-	-	-	-	-	-	-	+	-	-	+	+	-	+
Bacillus toyonensis (98%)	0053	MH356325	-	+	-	-	+	+	-	+	+	+	-	+	+	+	+	-	+	-	+	+	-	-	-	+	-	-	-	+	-	+
Bacillus megaterium (99%)	0054	MH356326	+	+	+	+	-	+	-	+	-	+	-	-	-	+	+	-	-	-	-	-	-	-	-	+	-	+	+	+	-	+
Bacillus aryabhattai (98%)	0055	MH356327	-	+	+	-	-	+	-	+	-	+	-	-	-	+	+	-	-	+	-	+	-	-	-	+	+	-	+	+	-	-
Bacillus megaterium (99%)	0056	MH356328	-	-	+	+	-	+	-	+	-	+	-	+	-	+	+	+	-	+	-	-	-	-	-	+	-	+	+	+	-	+
Bacillus megaterium (98%)	0057	MH356329	+	-	-	-	-	+	-	+	-	+	-	-	-	+	+	+	-	+	-	-	-	-	-	+	-	-	+	+	-	-
Bacillus megaterium (98%)	0058	MH569349	-	+	+	-	-	+	-	+	-	+	-	-	-	+	+	-	-	+	-	-	-	-	-	+	-	-	+	+	-	-
ND	0059		+	+	+	-	-	+	-	+	-	+	-	-	-	+	+	-	-	-	-	-	-	-	-	+	-	-	+	+	-	+
Bacillus pumilus (100%)	0060	MH356330	+	+	+	+	-	+	-	+	-	+	-	+	-	+	+	-	-	-	-	-	-	-	-	+	-	-	+	+	-	+
Bacillus cereus (99%)	0061	MH356331	-	+	+	-	+	+	-	+	-	+	-	+	-	+	+	-	+	+	+	+	-	-	-	+	-	-	-	-	-	+
ND	0062		-	+	+	-	+	+	-	+	-	+	-	+	-	+	+	-	-	-	-	+	-	-	-	+	-	-	-	-	-	+
Lysinibacillus. xylanilyticus (99%)	0063	MH356333	-	-	-	-	+	+	-	+	-	+	-	-	+	+	+	-	-	-	-	+	+	+	-	+	-	-	-	-	-	-
Bacillus megaterium (99%)	0064	MH356334	+	-	-	-	-	+	-	+	-	+	-	-	-	+	+	-	-	+	-	-	+	-	-	+	-	-	+	+	-	-
Bacillus aryabhattai (98%)	0065	MH356335	+	-	+	-	-	+	-	+	-	+	-	-	-	+	+	-	-	+	-	-	-	-	-	+	-	+	+	+	-	-
Rummeliibacillus pycnus (96%)	0066	MH356336	+	-	+	+	-	+	-	+	-	+	-	-	+	+	-	-	-	-	+	+	+	+	-	-	-	-	-	-	-	-
ND	0067		-	-	-	-	-	+	-	+	-	+	-	-	-	+	+	-	-	+	-	-	-	-	-	+	-	+	+	+	-	-
Bacillus simplex (100%)	0068	MH356337	-	-	+	-	-	+	-	+	-	+	-	-	+	+	+	-	-	-	+	+	+	+	-	+	-	-	-	-	-	-
Bacillus megaterium (99%)	0069	MH356338	-	-	-	-	+	+	-	+	-	+	-	-	+	+	+	+	+	-	+	+	-	-	-	+	-	-	+	+	-	+
Bacillus pumilus (99%)	0070	MH356339	+	-	+	+	-	+	-	+	-	+	-	+	-	+	+	+	-	-	-	-	-	-	-	+	-	-	+	+	-	+
Bacillus pumilus (98%)	0071	MH356340	+	-	+	+	-	+	-	+	-	+	-	+	-	+	+	+	-	-	-	-	-	-	-	+	-	-	+	+	-	-
Bacillus megaterium (99%)	0072	MH569350	+	-	+	-	-	+	-	+	-	+	-	-	-	+	+	-	-	+	-	-	-	-	-	+	-	-	-	+	-	-
ND	0073		-	+	+	-	+	+	-	+	+	+	-	+	+	+	+	-	-	+	-	-	-	-	-	+	-	-	+	-	-	-
Bacillus megaterium (99%)	0074	MH356341	-	-	+	-	-	+	-	+	-	+	-	-	+	+	+	-	-	-	-	-	-	-	-	+	-	-	+	+	-	-
Bacillus simplex (99%)	0075	MH356342	-	-	-	-	-	+	-	+	-	+	-	-	+	+	+	-	-	-	-	+	+	+	-	+	-	-	-	-	-	-
Bacillus megaterium (99%)	0076	MH356343	-	+	-	-	-	+	-	+	-	+	-	-	-	+	+	-	-	+	-	-	-	-	-	+	+	-	+	+	-	-
ND	0077		-	+	-	-	+	+	-	+	+	+	+	+	+	+	+	-	-	-	-	+	-	-	-	+	-	-	+	-	-	-
Bacillus megaterium (99%)	0078	MH356344	-	-	-	-	+	+	-	+	-	+	-	-	-	+	+	+	-	+	-	-	-	-	-	+	+	+	+	+	-	+
Bacillus pumilus (98%)	0079	MH356345	-	+	+	+	-	+	-	+	-	+	+	+	-	+	+	-	-	-	-	-	-	-	-	+	+	-	+	+	-	+
Paenibacillus alvei (99%)	0080	MH356346	-	+	+	-	+	+	-	+	+	-	-	-	-	-	+	-	-	-	-	-	-	-	+	+	-	-	-	+	-	+
ND	0081		-	+	+	+	+	+	-	+	-	+	-	-	-	+	+	-	+	-	-	-	-	-	-	+	+	-	+	+	-	+
Bacillus aryabhattai (99%)	0082	MH356347	-	-	-	-	-	+	-	+	-	+	-	-	-	-	+	-	-	+	-	-	-	-	-	+	-	-	-	+	-	-
ND	0083		+	-	+	+	-	+	-	+	-	+	-	-	-	+	+	+	+	-	-	-	-	-	-	+	+	-	+	+	-	+
Bacillus safensis (98%)	0084	MH356348	-	-	+	+	-	+	-	+	-	+	-	+	-	+	+	-	-	-	-	-	-	-	-	+	+	-	+	+	-	+
Bacillus thuringiensis (98%)	0085	MH569351	-	+	-	-	-	+	-	+	-	+	-	-	-	+	+	-	-	-	+	+	-	-	-	+	-	-	-	+	-	+
Bacillus aryabhattai (98%)	0086	MH356349	+	-	+	+	-	+	-	+	-	+	-	-	-	+	+	-	-	+	+	-	-	+	-	+	+	-	+	+	-	+
Bacillus pumilus (99%)	0087	MH356350	-	+	+	+	-	+	-	+	-	+	-	+	-	-	+	+	+	-	-	-	-	-	-	+	+	-	+	+	-	+
ND	0088		-	+	+	-	+	+	-	+	+	+	-	-	+	+	+	-	-	-	+	-	-	-	-	+	-	-	-	+	-	+
Bacillus anthracis (100%)	0089	MH356351	-	+	-	-	+	+	-	+	-	+	+	+	+	+	+	-	+	+	+	-	-	-	-	+	-	-	-	+	-	+
Bacillus pumilus (99%)	0090	MH569352	-	-	+	+	-	+	-	+	-	+	-	+	-	+	+	-	-	-	-	-	-	-	-	+	+	-	+	+	-	+
Bacillus safensis (98%)	0091	MH356352	-	-	+	+	-	+	-	+	-	+	-	+	-	+	+	+	-	-	-	-	-	-	-	+	+	-	-	+	-	+
Bacillus pumilus (98%)	0092	MH356353	-	-	+	+	-	+	-	+	-	+	-	+	-	+	+	+	-	-	-	-	-	-	-	+	+	-	+	+	-	+
Bacillus safensis (100%)	0093	MH356354	+	-	+	+	-	+	-	+	-	+	-	+	-	+	+	+	-	-	-	-	-	-	-	+	+	-	+	+	-	+
Bacillus megaterium (98%)	0094	MH356355	-	+	-	-	-	+	-	+	-	+	-	-	-	+	+	+	-	+	-	-	-	-	-	+	+	-	+	+	-	-
Bacillus megaterium (100%)	0095	MH356356	-	-	-	-	-	+	-	+	-	+	-	-	-	+	+	-	-	-	-	-	-	-	-	+	+	-	+	+	-	-
Bacillus megaterium (100%)	0096	MH356357	-	-	-	-	-	+	-	+	-	+	-	-	-	+	-	-	-	+	-	-	-	-	-	+	+	-	+	+	-	+
Bacillus megaterium (98%)	0097	MH356358	-	-	+	-	-	+	-	+	-	+	-	-	-	+	+	-	-	+	+	-	-	-	-	+	-	-	+	+	-	+
Bacillus safensis (98%)	0098	MH356359	-	-	+	+	-	+	-	+	-	+	-	+	-	-	+	-	-	-	-	-	-	-	-	+	+	-	-	+	-	+
Bacillus megaterium (97%)	0099	MH356360	-	-	+	-	-	+	-	+	-	+	-	-	-	+	+	-	-	+	-	-	-	-	-	+	+	+	+	+	-	+
Bacillus thuringiensis (98%)	0100	MH569353	-	-	-	-	+	+	-	+	-	+	+	+	-	+	+	-	-	-	+	+	+	-	-	+	+	-	-	+	-	+
Bacillus cereus (96%)	0101	MH569354	+	+	-	-	+	+	-	+	-	+	-	+	-	+	+	-	+	-	+	+	-	-	-	+	-	-	-	+	-	+
Bacillus pumilus (96%)	0102	MH356361	-	+	+	+	-	+	-	+	-	+	-	+	-	+	+	-	-	-	+	-	-	-	-	+	+	-	-	+	-	+
Bacillus safensis (98%)	0103	MH356362	-	+	+	-	-	+	-	+	-	+	-	+	-	+	+	+	-	-	-	-	-	-	-	+	+	-	+	+	-	+
Bacillus pumilus (99%)	0104	MH356363	-	-	+	-	-	+	-	+	-	+	-	+	+	-	+	-	-	-	-	-	-	-	-	+	+	-	-	+	-	+
Bacillus pumilus (100%)	0105	MH356364	+	-	+	+	-	+	-	+	-	+	-	+	+	+	+	-	-	-	-	-	-	-	-	+	+	-	+	+	-	+
Bacillus safensis (100%)	0106	MH356365	+	+	+	+	-	+	-	+	-	+	-	+	-	+	+	-	-	-	-	-	-	-	-	+	+	-	+	+	-	+
ND	0107		+	+	+	-	-	+	-	+	-	+	-	+	-	+	+	+	-	-	-	+	-	-	-	+	-	-	+	+	-	+
Bacillus pumilus (94%)	0108	MH569355	-	+	+	+	-	+	-	+	-	+	-	+	-	+	+	+	-	-	-	-	-	-	-	+	+	-	+	+	-	+
ND	0109		-	-	-	-	-	+	-	+	-	+	-	+	-	+	+	-	-	-	-	-	-	-	-	+	+	-	+	+	-	+
Bacillus amyloliquefaciens (100%)	0110	MH356366	-	+	+	+	-	+	-	+	-	+	-	+	-	+	+	-	-	-	+	-	-	-	-	+	+	-	+	+	-	+
ND	0111		-	+	-	-	-	+	-	+	-	+	-	-	-	+	+	-	-	+	-	-	-	-	-	+	-	-	+	+	-	+
Bacillus pumilus (100%)	0112	MH356367	-	-	+	+	-	+	-	+	-	+	-	+	-	+	+	-	-	-	-	-	-	-	-	+	+	-	+	+	-	+
Bacillus pumilus (100%)	0113	MH569356	-	-	+	+	-	+	-	+	-	+	-	+	-	+	+	+	-	-	-	-	-	-	-	+	+	-	+	+	-	+
Bacillus pumilus (98%)	0114	MH569357	-	-	+	+	+	+	-	+	-	+	-	+	-	+	+	-	-	-	-	-	-	-	-	+	+	-	+	+	-	+
Bacillus pumilus (99%)	0115	MH356368	+	-	+	+	-	+	-	+	-	+	-	+	-	+	+	+	-	-	-	+	-	-	-	+	+	+	+	+	-	+
Bacillus altitudinis (92%)	0116	MH569358	+	-	+	+	-	+	-	+	-	+	-	+	-	+	+	+	-	-	-	-	-	-	-	-	+	-	-	+	+	+
Bacillus altitudinis (99%)	0117	MH356369	-	-	+	+	-	+	-	+	-	+	-	+	-	+	+	-	-	-	-	-	-	-	-	+	+	-	+	+	-	+
Bacillus megaterium (99%)	0118	MH356370	+	-	+	+	-	+	-	+	-	+	-	+	-	+	+	-	-	-	-	-	-	-	-	+	+	-	+	+	+	+
Bacillus cereus (100%)	0119	MH356371	-	+	+	-	+	+	-	+	+	+	-	+	+	+	+	-	+	+	+	+	-	-	-	+	-	-	-	-	-	+
Bacillus pumilus (100%)	0120	MH356372	-	+	+	-	+	+	-	+	-	+	-	+	-	+	+	-	-	-	-	+	-	-	-	+	+	-	-	+	-	+
Bacillus pumilus (100%)	0121	MH356373	-	-	+	+	-	+	-	+	-	+	-	+	-	+	+	+	-	-	-	-	+	-	-	+	+	-	+	+	-	+
Bacillus safensis (100%)	0122	MH356374	+	-	+	+	-	+	-	+	-	+	-	+	-	+	+	-	-	-	-	+	-	-	-	+	-	-	+	+	-	+
Bacillus pumilus (100%)	0123	MH356375	+	-	+	-	-	+	-	+	-	+	-	+	+	+	+	+	-	-	-	-	-	+	-	+	+	+	+	+	-	+
Bacillus cereus (99%)	0124	MH569359	+	-	+	+	-	+	-	+	-	+	-	+	-	+	+	+	-	-	-	-	-	+	-	-	+	-	+	-	-	+
Bacillus pumilus (100%)	0125	MH356376	+	-	+	+	-	+	-	+	-	+	-	+	-	+	+	+	-	-	-	-	-	+	-	-	+	-	+	+	-	+
Bacillus pumilus (100%)	0126	MH356377	-	-	+	+	-	+	-	+	-	+	-	+	-	+	+	+	-	-	-	-	-	-	-	+	+	-	+	+	-	+
Bacillus siamensis (98%)	0127	MH356378	+	-	+	+	-	+	-	+	-	+	-	-	+	+	+	+	-	-	-	+	+	+	-	+	+	-	+	+	-	+
Bacillus subtilis (99%)	0128	S#AC	+	-	+	+	-	+	-	+	-	+	-	-	+	+	+	+	-	-	-	+	+	+	-	+	-	-	+	+	-	+
Bacillus pumilus (99%)	0129	MH356379	+	-	+	-	-	+	-	+	-	+	-	+	-	+	+	+	-	-	-	-	-	+	-	-	+	-	+	+	-	+
Bacillus pumilus (100%)	0130	MH356380	+	-	+	-	-	+	-	+	-	+	-	+	-	+	+	+	-	-	-	+	+	+	-	+	+	-	+	+	-	+
Bacillus pumilus (99%)	0131	MH356381	+	-	+	+	-	+	-	+	-	+	-	+	-	+	+	+	-	-	-	-	-	+	-	-	-	-	+	+	-	+
Bacillus pumilus (99%)	0132	MH356382	+	-	+	+	-	+	-	+	-	+	-	+	-	+	+	+	-	-	-	-	+	+	-	-	+	-	+	+	-	+
Paenibacillus alvei (99%)	0133	MH356383	+	-	+	-	-	+	-	+	-	+	-	+	-	+	+	+	-	-	-	-	-	+	-	-	+	-	+	+	-	+
Bacillus safensis (100%)	0134	MH356384	+	-	+	+	-	+	-	+	-	+	-	+	-	+	+	-	-	-	-	-	-	+	-	-	-	-	+	-	-	+
Bacillus pumilus (100%)	0135	MH356385	+	-	+	+	-	+	-	+	-	+	-	+	-	+	+	-	-	-	-	+	-	+	-	+	+	-	+	+	-	+
Bacillus pumilus (99%)	0136	MH356386	-	+	+	-	-	+	-	+	-	+	-	+	-	+	+	-	-	-	-	+	-	-	-	+	+	-	+	+	-	+
Bacillus pumilus (99%)	0137	MH356387	+	-	+	+	-	+	-	+	-	+	-	+	-	+	+	+	-	-	-	-	-	+	-	-	-	-	+	-	-	+
Bacillus pumilus (95%)	0138	MH356388	-	-	+	+	-	+	-	+	-	+	-	+	-	+	+	+	-	-	-	-	+	-	-	+	-	-	+	+	-	+
Bacillus pumilus (94%)	0139	MH569360	+	-	+	+	-	+	-	+	-	+	-	+	-	+	+	+	-	-	-	-	-	+	-	+	+	-	+	+	-	-
Bacillus pumilus (97%)	0140	MH569361	-	+	+	-	-	+	-	+	-	+	-	+	-	+	+	+	-	-	-	-	-	+	-	-	-	-	+	-	-	+
Bacillus pumilus (99%)	0141	MH356389	+	-	+	+	-	+	-	+	-	+	-	+	+	+	+	+	+	-	-	-	-	+	-	+	-	-	+	+	-	+
Bacillus pumilus (99%)	0142	MH356390	+	-	+	+	-	+	-	+	-	+	-	+	-	+	+	-	+	-	-	+	-	-	-	+	-	-	+	+	-	-
Bacillus pumilus (94%)	0143	MH356391	-	-	+	+	-	+	-	+	-	+	-	+	-	+	+	+	-	-	-	-	+	+	-	-	-	-	+	-	-	+
Bacillus simplex (99%)	0144	MH356392	+	-	+	+	-	+	-	+	-	+	-	+	-	+	+	+	-	-	-	+	+	+	-	-	-	-	+	+	-	+
Bacillus pumilus (99%)	0145	MH356393	+	-	+	+	-	+	-	+	-	+	-	+	-	+	+	+	-	-	-	-	+	+	-	-	+	-	+	+	-	+
Bacillus pumilus (98%)	0146	MH356394	-	-	+	+	-	+	-	+	-	+	-	+	-	+	+	+	-	-	-	-	-	+	-	+	+	-	-	-	+	+
Bacillus safensis (98%)	0147	MH356395	+	-	+	+	-	+	-	+	-	+	-	+	-	-	+	-	-	-	-	-	-	+	-	+	+	-	+	+	-	+
Bacillus pumilus (99%)	0148	MH356396	-	-	+	+	-	+	-	+	-	+	-	+	-	+	+	+	+	-	-	-	-	-	-	+	+	-	+	+	-	+
Bacillus pumilus (99%)	0149	MH356397	+	+	+	+	-	+	-	+	-	+	-	+	-	+	+	-	-	-	-	-	-	+	-	-	+	-	+	+	-	+
Bacillus velezensis (100%)	0150	MH356398	-	-	+	+	-	+	-	+	-	+	-	+	+	-	+	-	-	-	-	+	+	+	-	+	-	+	+	+	-	+
Bacillus safensis (99%)	0151	MH356399	-	-	+	+	-	+	-	+	-	+	+	+	-	+	+	+	-	-	-	-	-	-	-	+	+	-	+	+	-	+
Bacillus pumilus (99%)	0152	MH356400	-	-	+	+	-	+	-	+	-	+	+	+	+	+	+	-	-	-	-	-	-	-	-	+	+	-	+	+	-	-
Bacillus altitudinis (99%)	0153	MH569362	-	-	+	+	+	+	-	+	-	+	+	+	-	+	+	-	-	-	-	-	-	-	-	+	+	-	+	+	-	+
Bacillus pumilus (99%)	0154	MH569363	-	-	+	-	-	+	-	+	-	+	+	+	-	+	+	-	-	-	-	-	-	-	-	+	+	-	+	+	-	+
Bacillus cereus (100%)	0155	MH356401	-	+	-	-	+	+	-	+	-	+	+	+	+	+	+	-	+	-	-	+	-	-	-	+	-	-	-	+	-	-
Bacillus pumilus (100%)	0156	MH356402	-	+	+	-	+	+	-	+	-	+	-	-	-	+	-	-	-	-	-	+	-	-	-	+	+	-	+	+	-	-
Bacillus pumilus (100%)	0157	MH356403	-	+	-	-	+	+	-	+	-	+	-	-	-	+	-	-	-	-	-	-	-	-	-	+	+	-	+	+	+	-
ND	0158		-	+	+	-	-	-	-	+	-	+	-	+	+	+	+	-	+	-	-	+	-	-	-	+	+	-	+	+	+	-
Bacillus cereus (97%)	0159	MH356404	-	-	-	-	+	+	-	+	-	+	+	-	+	+	+	-	+	-	+	+	-	-	-	+	-	-	-	+	-	-
Bacillus arbutinivorans (97%)	0160	MH356405	-	-	-	-	-	-	-	-	-	-	-	-	+	-	-	-	+	-	-	-	-	-	-	+	-	-	-	+	-	-
Bacillus thuringiensis (100%)	0161	MH356406	-	+	-	-	+	+	-	+	-	+	-	-	+	+	+	-	+	-	+	+	-	-	-	+	-	-	-	+	-	-
Paenibacillus susongensis (99%)	0162	MH356407	-	-	-	-	+	-	-	+	-	+	+	-	-	-	-	-	-	-	-	-	-	-	-	+	-	+	-	+	+	-
Bacillus australimaris (98%)	0163	MH356408	-	+	-	-	+	+	-	+	-	+	+	+	-	+	+	-	+	-	+	+	-	-	-	+	-	-	-	+	-	-
Paenibacillus alvei (99%)	0164	MH356409	-	-	-	-	+	+	-	-	-	+	+	-	+	+	+	+	+	-	-	-	-	-	+	+	-	+	-	+	-	+
ND	0165		-	-	-	-	+	-	-	+	-	+	+	-	-	-	-	-	-	-	-	-	-	-	+	+	-	+	-	+	-	-
ND	0166		-	-	-	-	+	+	-	+	-	-	+	+	-	+	-	-	+	-	-	-	-	-	-	+	-	+	-	+	+	-
ND	0167		-	-	-	-	+	+	-	+	-	+	-	+	-	-	-	-	-	-	-	-	-	-	-	+	+	-	-	+	-	-
Paenibacillus alvei (85%)	0168	S#AC	-	-	-	-	+	-	-	+	-	+	-	+	-	-	-	-	-	-	-	-	-	-	+	+	+	-	+	+	-	-
Bacillus drepressus (90%)	0169	S#AC	-	+	-	-	+	+	-	+	-	+	-	+	+	+	+	-	+	-	+	+	-	-	-	+	-	-	-	+	-	-
ND	0170		-	-	-	-	+	+	-	+	-	+	+	-	+	-	-	-	-	-	-	-	-	-	+	+	-	-	-	+	-	+
Bacillus pumilus (98%)	0171	MH569364	-	+	+	+	+	+	-	+	-	+	-	+	-	+	+	-	-	-	-	-	-	-	-	+	+	-	+	+	-	-
Paenibacillus illinoisensis (90%)	0172	MH569365	-	-	+	-	-	+	-	+	-	+	-	+	+	-	-	-	+	-	-	-	-	-	-	+	+	+	+	+	+	+
Bacillus pumilus (98%)	0173	MH356410	-	+	+	+	-	+	-	+	-	+	-	+	-	+	-	-	-	-	-	-	-	-	-	+	-	-	-	+	-	-
Lysinibacillus sphaericus (100%)	0174	MH356411	-	-	-	-	-	+	-	+	-	+	-	-	-	-	-	-	-	-	-	+	+	+	+	+	-	-	-	-	-	-
Bacillus pumilus (97%)	0175	MH569366	-	+	-	-	+	+	+	+	-	+	-	+	-	+	-	-	-	-	-	-	-	-	-	+	-	-	+	+	-	+
Bacillus megaterium (99%)	0176	MH356412	+	-	-	-	-	+	-	+	-	+	-	-	+	+	+	+	+	+	-	-	-	-	-	+	+	+	+	+	-	-
Bacillus pumilus (99%)	0177	MH356413	-	-	+	+	-	-	-	+	-	+	-	+	-	+	+	-	-	-	-	-	-	+	-	+	+	-	+	+	-	-
Bacillus thuringiensis (98%)	0178	MH356414	-	-	-	-	+	+	-	+	+	+	+	+	+	+	+	-	+	-	+	+	-	-	-	+	-	-	-	-	-	-
Bacillus pumilus (99%)	0179	MH356415	-	+	-	-	+	+	-	+	-	+	-	+	-	+	+	-	+	-	-	-	-	-	-	+	+	-	-	+	-	-
Lysinibacillus xylanilyticus (98%)	0180	MH569367	-	-	+	+	+	+	+	+	-	+	-	+	+	+	+	-	-	-	-	-	-	-	-	+	+	-	-	+	-	-
Bacillus anthracis (100%)	0181	MH569368	-	+	+	+	+	-	-	+	+	+	-	-	-	+	+	-	+	-	-	-	-	-	-	+	-	-	-	-	-	-
Bacillus cereus (98%)	0182	MH569369	-	+	+	+	+	+	-	+	+	+	-	+	-	+	+	-	+	-	-	-	-	-	-	+	-	-	-	+	-	-
ND	0183		-	-	-	-	+	+	-	+	-	+	-	-	-	-	-	-	+	-	-	+	-	-	-	+	-	-	-	-	-	-
Bacillus cereus (99%)	0184	MH356416	-	+	-	-	+	+	-	+	+	+	+	+	+	+	+	-	+	-	+	+	-	-	-	+	-	-	-	+	-	-
ND	0185		-	-	-	-	+	+	-	+	-	+	+	-	+	-	-	-	+	-	-	-	-	-	-	+	-	+	+	+	+	-
Bacillus anthracis (99%)	0186	MH356417	-	+	-	-	+	+	-	+	+	+	-	+	+	+	+	-	-	-	-	+	-	-	-	+	-	-	-	+	-	-
Bacillus pumilus (99%)	0187	MH356418	-	-	-	-	+	+	-	+	+	+	+	-	-	-	+	-	-	-	-	-	-	-	+	+	-	-	-	+	-	-
Brevibacillus agrii (99%)	0188	MH569370	-	+	-	-	-	+	-	+	-	+	-	-	+	+	-	-	-	-	-	-	-	-	-	+	-	-	-	-	-	-
ND	0189		-	-	-	-	+	+	-	+	+	+	+	-	-	-	+	-	-	-	-	-	-	-	+	+	-	-	-	+	-	-
Bacillus pumilus (100%)	0190	MH356419	-	-	+	+	-	+	+	+	-	+	-	+	-	+	+	-	-	-	-	-	-	-	-	+	-	-	-	+	-	-
Terribacillus goriensis (100%)	0191	MH356420	-	-	-	-	-	-	-	+	-	+	-	+	-	+	+	-	-	-	-	+	+	+	-	-	-	-	-	-	-	-
ND	0192		-	+	+	-	+	+	-	+	-	+	-	+	-	+	+	-	-	-	-	-	-	+	-	+	+	-	+	+	-	+
ND	0193		-	-	+	+	+	+	-	+	+	+	-	+	-	-	+	-	-	-	-	+	-	-	+	+	+	-	+	+	+	-
Bacillus cereus (98%)	0194	MH356421	-	+	-	-	+	+	-	+	-	+	+	+	-	+	+	-	+	-	-	+	-	-	-	+	-	-	-	+	-	+
Brevibacillus laterosporus (99%)	0195	MH569371	-	-	-	-	-	+	-	-	-	+	-	+	-	+	+	-	-	-	-	-	-	-	-	+	-	-	-	+	-	+
Bacillus safensis (98%)	0196	MH356422	-	+	+	+	-	+	+	+	-	+	-	+	-	+	+	-	-	-	-	-	-	-	-	+	-	-	-	-	-	+
Brevibacillus laterosporus (99%)	0197	MH356423	-	-	-	-	-	-	-	+	-	+	-	+	+	-	+	-	-	-	-	-	-	-	+	+	-	-	+	-	-	-
Bacillus pumilus (100%)	0198	MH356424	-	-	+	+	-	+	+	+	-	+	-	+	-	+	+	-	-	-	-	-	-	-	-	+	-	-	-	+	-	+
Bacillus anthracis (97%)	0199	MH356425	-	-	+	+	+	+	+	+	-	+	-	+	-	+	+	-	-	-	-	-	-	-	-	+	-	-	+	+	-	-
Bacillus cereus (99%)	0200	MH569372	-	+	+	-	+	+	-	+	+	+	+	+	+	+	+	-	+	-	+	+	-	-	-	+	-	-	-	+	-	+
Bacillus pumilus (97%)	0201	MH356426	-	+	+	+	-	+	+	+	-	+	-	+	-	-	+	-	-	-	-	-	-	-	-	+	+	-	-	+	-	+
Bacillus pumilus (98%)	0202	MH569373	+	+	+	+	-	+	-	+	-	+	-	+	+	+	+	-	-	-	-	-	-	-	-	+	+	-	+	+	-	+
Bacillus cereus (90%)	0203	MH569374	-	-	+	-	-	-	-	-	-	+	+	+	+	-	-	-	-	-	-	-	-	-	+	+	-	-	+	-	-	-
Bacillus altitudinis (97%)	0204	MH356427	-	+	+	+	+	+	+	+	-	+	-	+	-	-	+	-	-	-	-	-	-	-	-	+	+	-	+	+	-	+
Bacillus altitudinis (97%)	0205	MH356428	-	+	+	+	-	+	+	+	-	+	-	+	-	-	+	-	-	-	-	-	-	-	-	+	-	-	-	+	-	+
Bacillus cereus (97%)	0206	MH356429	-	+	-	-	+	+	-	+	-	+	-	+	+	+	+	-	+	-	+	-	-	-	-	+	-	-	-	+	-	+
Bacillus pumilus (99%)	0207	MH569375	-	+	+	+	+	+	+	+	-	+	-	+	-	+	+	-	-	-	-	-	-	-	-	-	+	-	+	+	-	+
Bacillus pumilus (99%)	0208	MH569376	-	-	+	+	-	+	-	+	-	+	-	+	-	+	+	-	-	-	-	-	-	-	-	-	+	-	+	+	-	+
ND	0209		-	+	+	-	-	+	-	+	-	+	-	+	-	+	+	-	-	-	-	-	-	-	-	-	+	-	+	+	-	-
ND	0210		-	-	+	-	-	-	-	+	-	+	-	-	-	-	-	-	-	-	-	-	-	-	-	-	-	-	-	-	-	-
ND	0211		-	-	-	-	-	-	-	+	-	+	-	-	-	-	+	-	-	-	-	-	-	-	-	+	-	+	-	+	+	-
Paenibacillus chibensis (96%)	0212	MH569377	-	-	+	-	+	+	-	+	-	+	-	+	-	+	+	-	-	-	-	-	-	-	-	-	+	-	+	+	-	-
Paenibacillus alvei (97%)	0213	MH356430	-	-	-	-	+	-	-	-	-	+	-	-	-	-	+	-	+	-	-	-	-	-	+	-	-	+	+	+	-	+
Bacillus luciferensis (98%)	0214	MH569378	-	+	-	-	-	-	-	+	-	+	-	+	-	-	+	-	-	-	+	+	+	+	+	-	+	-	+	+	-	-
Paenibacillus lautus (96%)	0215	MH356431	-	-	-	-	+	-	-	-	-	+	+	-	+	-	-	-	-	-	-	-	-	-	-	-	-	-	+	+	-	+
Bacillus senegalensis (98%)	0216	MH569379	-	+	-	-	+	+	-	-	-	+	-	-	-	-	-	-	-	-	-	+	+	+	-	-	-	-	-	-	-	-
ND	0217		-	-	-	-	+	-	+	+	-	+	-	+	-	-	-	-	-	-	-	+	+	+	-	-	+	-	-	-	-	-
Brevibacillus brevis (98%)	0218	S#AC	-	-	+	-	-	+	-	-	-	-	+	+	-	-	-	-	-	-	-	+	+	+	-	-	-	-	+	-	-	-
Bacillus cereus (98%)	0219	MH356432	-	+	+	+	+	-	-	+	-	+	+	+	-	-	+	-	-	-	-	+	-	-	-	+	+	-	+	-	-	+
Brevibacillus laterosporus (99%)	0220	MH356433	-	+	-	-	+	-	-	+	-	+	-	+	-	-	+	-	+	-	+	+	-	-	-	-	-	-	-	+	-	-
Bacillus cereus (96%)	0221	MH569380	-	+	+	-	+	+	-	+	-	+	-	+	+	+	+	-	+	-	-	+	-	-	-	+	-	-	-	-	-	+
ND	0222		-	+	-	-	+	+	-	-	-	+	+	+	-	-	-	-	-	-	-	+	+	+	-	-	-	-	-	-	-	-
ND	0223		-	-	-	-	+	+	+	+	-	+	+	-	+	-	-	-	+	-	-	-	-	-	-	-	+	+	+	+	-	-
Bacillus thuringiensis (96%)	0224	S#AC	-	+	+	-	+	+	-	+	-	+	-	+	+	+	+	-	+	-	+	+	-	-	-	-	-	+	+	+	-	+
Bacillus thuringiensis (100%)	0225	MH569381	-	+	+	-	+	+	-	+	-	+	-	+	+	+	+	-	+	-	+	+	-	-	-	-	-	-	-	+	-	+
Bacillus cereus (96%)	0226	MH356434	-	+	+	+	+	+	-	+	-	+	-	+	+	+	+	-	+	-	+	+	+	-	-	-	-	-	-	-	-	+
Paenibacillus ginsengagri (100%)	0227	MH569382	-	+	+	-	+	+	-	+	-	+	-	+	-	+	+	-	-	-	+	-	-	-	-	-	-	-	-	+	-	+
Bacillus megaterium (99%)	0228	MH356435	-	-	-	-	+	+	-	+	-	+	+	-	-	+	+	-	+	-	-	-	-	-	-	-	-	+	-	+	-	-
Bacillus cereus (98%)	0229	MH356436	-	+	-	-	+	-	-	+	+	+	-	+	-	+	+	-	+	-	+	-	-	-	-	-	-	-	-	+	-	+
Bacillus pumilus (99%)	0230	MH356437	-	-	+	+	-	-	-	+	-	+	+	-	-	-	-	+	-	-	-	-	-	-	-	-	-	+	-	+	-	+
Bacillus pumilus (99%)	0231	MH356438	-	-	+	-	+	-	-	+	-	+	+	-	-	-	-	-	+	-	-	-	-	-	-	-	+	+	-	-	-	+
Bacillus cereus (98%)	0232	MH569383	-	+	+	+	+	-	-	+	+	+	-	+	+	+	+	-	+	-	-	+	-	-	-	+	-	-	-	+	-	+
Bacillus aryabhattai (98%)	0233	MH356439	-	+	-	-	-	+	-	+	-	+	-	-	+	+	-	-	+	-	-	-	-	-	-	-	-	-	-	+	-	+
ND	0234		-	+	-	-	-	-	-	+	-	+	-	-	+	+	+	-	-	-	-	+	-	-	+	-	-	+	-	+	-	-
Bacillus thuringiensis (98%)	0235	MH356440	-	+	-	-	+	+	-	+	+	+	-	+	+	+	+	-	+	+	+	+	-	-	-	+	-	-	-	-	-	+
Bacillus simplex (99%)	0236	MH356441	-	-	+	-	+	+	+	+	-	+	-	-	+	-	-	-	-	-	+	+	+	+	-	-	-	+	-	-	-	+
Bacillus cereus (97%)	0237	MH356442	-	+	+	+	+	-	-	+	-	+	-	-	+	+	+	-	+	-	-	-	-	-	-	-	-	+	-	+	-	+
ND	0238		-	+	+	-	-	-	-	+	+	+	-	-	+	+	+	-	-	-	-	+	-	-	-	-	+	+	+	+	-	-
Bacillus cereus (98%)	0239	MH569384	-	+	+	-	+	+	-	+	+	+	+	+	+	+	+	-	+	-	+	+	-	-	-	+	-	-	-	-	-	-
Paenibacillus terrigena (97%)	0240	MH356443	-	-	-	-	+	-	-	+	+	+	+	+	-	-	-	-	-	-	-	-	-	-	-	-	-	+	-	+	-	-
ND	0241		-	-	-	-	+	+	-	+	+	+	-	-	-	+	+	-	-	-	-	-	-	-	-	+	-	+	-	+	-	+
Bacillus megaterium (99%)	0242	MH569385	-	+	-	-	+	-	-	-	-	+	-	-	+	+	-	-	+	-	-	-	-	-	-	-	+	-	+	+	-	+
ND	0243		-	+	-	-	-	+	-	+	-	+	-	+	+	+	+	-	-	-	-	-	+	-	-	-	+	-	-	+	-	-
Bacillus megaterium (98%)	0244	MH569386	-	+	-	-	+	-	-	+	-	+	-	-	+	+	+	-	+	-	-	-	-	-	-	-	+	-	+	+	-	-
Bacillus megaterium (97%)	0245	MH569387	-	+	-	-	+	+	-	+	-	+	-	-	+	+	+	-	+	-	-	-	-	-	-	-	+	-	+	+	-	-
Bacillus aryabhattai (99%)	0246	MH356444	-	+	-	-	+	+	-	+	-	+	-	-	+	+	+	-	-	-	-	-	-	-	-	-	+	+	-	+	-	+
ND	0247		-	-	-	-	+	-	-	-	-	+	+	-	+	-	-	-	-	-	-	+	+	+	-	-	-	-	-	-	-	-
Bacillus cereus (100%)	0248	MH569388	-	+	-	-	+	+	-	+	-	+	+	+	+	+	+	-	+	-	-	+	-	-	-	-	-	-	-	-	-	+
Bacillus cereus (96%)	0249	MH356445	-	+	-	-	+	+	-	+	-	+	-	+	+	+	+	-	+	-	+	+	-	-	-	-	-	-	-	+	-	+
Bacillus cereus (98%)	0250	MH356446	-	+	-	-	+	+	-	+	+	+	-	+	+	+	+	-	+	-	+	-	-	-	-	+	-	+	-	+	-	+
Lysinibacillus xylanilyticus (93%)	0251	MH569389	-	+	-	-	-	-	-	+	-	+	-	+	-	-	+	-	-	-	-	+	+	+	-	-	-	-	-	-	-	-
ND	0252		-	+	-	-	-	+	-	+	+	+	-	-	-	-	+	-	+	-	-	+	+	+	-	-	-	-	+	-	-	-
ND	0253		-	-	-	-	+	-	-	+	-	+	-	+	-	-	-	-	-	-	-	-	-	-	-	-	-	+	-	+	-	-
Bacillus subterraneus (97%)	0254	MH569390	-	-	-	-	-	+	-	-	-	+	-	-	-	-	+	-	-	-	-	-	-	-	-	-	-	+	-	+	-	-
Lysinibacillus xylanilyticus (93%)	0255	MH569391	-	-	-	-	-	+	-	+	+	+	-	+	-	-	-	-	-	-	-	+	+	+	-	-	-	-	-	-	-	-
Bacillus subterraneus (99%)	0256	MH569392	-	-	-	-	-	+	-	+	-	+	-	-	+	-	-	-	-	-	-	+	+	+	-	-	-	-	-	-	-	-
Bacillus thuringiensis (96%)	0257	MH356447	-	+	+	+	+	-	-	+	+	+	-	+	+	+	+	-	-	-	+	+	-	-	-	+	-	-	-	+	-	+
ND	0258		-	+	+	-	+	+	-	+	+	+	-	+	+	-	+	-	+	-	+	-	-	-	-	-	-	-	-	-	-	-
Paenibacillus chibensis (98%)	0259	MH356448	-	-	-	-	+	+	-	+	-	+	-	-	+	-	-	-	+	-	+	-	-	-	-	-	+	+	+	+	-	-
ND	0260		-	-	-	-	+	+	-	+	-	+	+	-	-	+	-	-	+	-	-	-	-	-	-	-	+	+	+	+	-	-
ND	0261		-	-	-	-	-	-	-	+	-	+	-	+	-	+	+	-	-	-	-	+	+	+	+	-	-	+	+	+	-	-
ND	0262		-	-	-	-	-	+	-	+	-	+	-	-	+	-	+	-	-	-	-	+	+	+	-	-	-	-	-	-	-	-
ND	0263		-	-	-	-	-	+	-	+	+	+	-	+	-	-	+	-	-	-	-	+	+	+	+	-	-	+	+	-	-	-
ND	0264		+	+	-	-	-	+	-	+	-	+	-	+	-	-	+	-	-	-	-	+	+	+	-	-	-	-	-	-	-	-
Paenibacillus lautus (98%)	0265	MH356449	-	-	-	-	-	+	-	+	-	+	-	-	-	-	+	+	+	-	-	-	+	-	-	+	+	-	+	+	+	+
Bacillus pumilus (96%)	0266	MH569393	+	+	+	+	+	+	-	+	-	+	-	+	-	-	+	-	-	-	-	-	-	-	-	-	+	-	+	-	-	-
ND	0267		-	-	-	-	+	-	-	+	-	+	-	-	-	-	+	-	-	-	-	-	-	-	+	+	-	-	+	-	-	-
ND	0268		-	+	-	-	+	+	-	+	+	+	-	-	+	-	+	-	-	-	-	+	-	-	-	-	-	-	-	-	-	-
Bacillus amyloliquefaciens (98%)	0269	MH569394	+	-	+	-	+	+	-	+	-	+	+	+	+	-	+	+	+	-	-	+	+	+	-	+	+	-	+	+	+	-
Bacillus cereus (97%)	0270	MH569395	-	+	+	-	+	+	-	+	-	+	+	-	+	+	+	-	+	-	-	-	-	-	-	+	-	-	-	-	+	-
ND	271		-	+	-	-	+	-	-	+	+	+	-	+	+	+	+	-	+	-	+	+	-	-	-	+	-	-	-	-	+	-
Bacillus cereus (97%)	0272	MH569396	-	+	-	-	+	+	-	+	-	+	+	+	+	+	+	-	+	-	+	+	-	-	-	+	-	-	-	-	-	-
Bacillus pumilus (97%)	0273	MH569397	-	+	+	+	-	+	-	+	-	+	+	+	+	+	+	-	-	-	-	-	-	-	-	+	+	-	+	+	-	-
ND	0274		-	-	-	-	-	+	-	+	-	+	-	-	+	+	+	+	+	-	-	-	-	-	-	+	+	-	+	+	+	-
ND	0275		+	+	+	-	-	+	-	+	+	+	-	+	+	+	+	-	+	-	+	-	-	-	-	+	-	-	-	+	-	-
Bacillus thuringiensis (99%)	0276	MH356450	-	+	-	-	+	+	-	+	-	+	+	+	+	+	+	-	+	-	+	+	-	-	-	+	-	-	-	-	-	+
Bacillus megaterium (97%)	0277	MH356451	-	+	-	-	-	+	-	+	-	+	-	-	+	+	+	-	+	-	-	+	-	-	-	+	-	-	-	+	-	+
Bacillus cereus (97%)	0278	MH356452	-	-	-	-	+	-	-	+	-	+	-	+	+	+	+	-	-	-	+	-	-	-	-	+	-	-	-	-	+	+
Bacillus amyloliquefaciens (99%)	0279	MH356453	+	+	+	+	-	+	-	+	-	+	-	+	+	-	+	-	+	-	-	+	+	+	-	+	-	-	+	+	-	+
Bacillus velezensis (99%)	0280	MH356454	+	-	+	+	+	+	-	+	-	+	-	+	-	-	+	-	-	-	-	+	+	+	-	+	-	-	+	+	-	-
Bacillus safensis (100%)	0281	MH356455	-	+	+	-	+	+	-	+	-	+	-	+	-	-	+	-	-	-	-	-	+	-	-	+	+	-	+	-	-	+
Bacillus tequilensis (99%)	0282	MH356456	+	-	+	+	+	+	-	+	-	+	-	+	+	-	+	+	+	-	-	-	-	-	-	+	+	-	+	+	+	+
Bacillus cereus (100%)	0283	MH356457	-	+	+	-	+	+	-	+	-	+	+	+	+	+	+	-	+	-	+	+	-	-	-	+	-	-	-	+	-	+
Lysinibacillus fusiformis (100%)	0284	MH356458	-	-	+	+	-	+	-	+	-	+	-	+	+	-	+	-	-	-	-	+	-	-	+	+	+	-	-	+	-	-
Bacillus subtilis (99%)	0285	MH356459	+	-	+	+	+	+	-	+	-	+	-	+	+	+	+	+	+	-	-	-	+	-	-	+	-	-	+	-	-	-
Bacillus cereus (99%)	0286	MH356460	-	+	-	-	+	+	-	+	-	+	+	+	+	+	+	-	+	-	+	+	-	-	-	+	+	-	-	+	-	+
Bacillus velezensis (99%)	0287	MH356461	+	-	+	-	+	+	-	+	-	+	+	+	+	-	+	+	+	-	-	+	+	+	-	+	-	-	+	+	-	-
Bacillus thuringiensis (100%)	0288	MH356462	+	-	-	-	+	+	-	+	+	+	+	+	+	+	+	+	+	-	+	+	-	-	-	+	-	-	-	+	-	+
ND	0289		-	-	-	-	-	-	-	+	-	+	-	-	+	-	-	-	+	-	-	-	-	+	-	-	-	-	-	+	-	-
ND	0290		-	-	+	-	-	+	-	+	-	+	-	-	+	-	-	+	+	-	-	-	-	-	-	+	-	+	+	-	-	-
Bacillus aryabhattai (98%)	0291	MH569398	-	+	-	-	+	+	-	+	+	+	-	-	+	+	+	-	-	-	-	-	-	-	-	+	+	-	+	+	+	+
Bacillus pumilus (99%)	0292	MH356463	-	+	+	+	-	+	-	+	+	+	-	+	-	+	+	+	-	-	-	-	-	+	-	+	+	-	+	+	-	+
ND	0293		-	-	+	+	-	+	-	+	-	+	-	-	+	+	+	-	+	-	-	-	-	-	+	+	+	-	-	+	-	-
Bacillus thuringiensis (100%)	0294	MH356464	-	+	+	-	+	+	-	+	-	+	+	+	+	+	+	-	+	-	+	+	-	-	-	+	+	-	-	+	-	+
Bacillus cereus (100%)	0295	MH356465	-	+	-	-	+	+	-	+	+	+	+	+	+	+	+	-	+	-	+	+	-	-	-	+	-	-	-	+	-	+
ND	0296		-	+	-	-	-	+	-	+	+	+	-	+	-	-	+	-	-	-	-	+	+	+	-	+	+	+	+	+	-	-
Bacillus kochii (99%)	0297	MH356466	+	+	+	-	-	+	-	+	+	+	-	-	+	+	+	-	-	-	-	+	-	-	-	+	-	-	-	+	-	-
Bacillus megaterium (99%)	0298	MH356467	-	+	-	-	-	+	-	+	+	+	-	+	+	+	-	-	+	-	+	+	-	-	-	+	-	+	-	+	+	+
Bacillus cereus (99%)	0299	MH356468	-	+	-	-	+	+	-	+	+	+	+	+	+	+	+	-	+	-	+	+	+	-	-	+	-	+	-	+	+	+
Bacillus cereus (99%)	0300	MH356469	-	+	-	-	+	+	-	+	+	+	+	+	+	+	+	-	+	-	+	+	-	-	-	+	-	+	-	+	+	+
Bacillus thuringiensis (98%)	0301	MH356470	+	+	-	-	+	-	-	+	+	+	-	+	+	+	+	-	+	-	+	+	-	-	-	+	-	-	-	+	+	+
Bacillus amyloliquefaciens (98%)	0302	MH356471	-	-	+	+	+	+	-	+	+	+	+	+	+	+	+	+	+	-	-	+	+	+	-	+	-	-	+	+	-	-
Bacillus thuringiensis (97%)	0303	MH356472	+	+	-	-	+	-	-	+	+	+	-	+	+	+	+	-	-	-	+	-	-	-	-	+	-	-	-	+	-	+
Bacillus cereus (99%)	304	MH356473	-	+	+	-	+	+	-	+	+	+	+	+	+	+	+	-	-	-	+	+	-	-	-	+	-	+	-	+	-	+
Bacillus cereus (99%)	0305	MH356474	+	+	-	-	+	+	-	+	+	+	+	+	+	+	+	-	+	-	+	+	-	-	-	+	-	-	-	+	-	+
ND	0306		-	-	-	-	-	-	-	+	-	+	-	+	+	+	+	-	+	-	-	+	-	-	-	+	-	-	-	+	-	-
ND	0307		+	+	+	-	-	-	-	+	-	+	-	-	+	-	+	-	+	-	-	+	-	-	+	+	-	-	-	+	-	-
Bacillus simplex (97%)	0308	MH356475	-	+	-	-	-	-	-	-	-	+	-	+	+	+	+	-	-	-	-	+	+	+	-	+	-	-	+	+	-	-
Bacillus megaterium (95%)	0309	MH356476	+	+	-	-	+	+	-	+	-	+	-	-	+	+	+	+	+	-	-	-	-	-	-	+	+	-	+	+	+	+
Bacillus cereus (99%)	0310	MH356477	-	+	-	-	+	+	-	+	-	+	+	+	+	+	+	-	+	-	+	+	-	-	-	+	-	-	-	+	-	+
Bacillus megaterium (96%)	0311	MH356478	-	+	-	-	+	+	-	+	-	+	-	-	+	+	+	-	-	-	+	-	-	-	-	+	-	-	+	+	-	+
Bacillus pumilus (96%)	0312	MH356479	+	+	+	+	-	+	-	-	-	+	-	+	-	+	+	-	-	-	+	-	-	-	-	+	+	-	+	+	-	+
ND: not determined.
